# Supplementary material for: Deriving Mendelian Randomization-based Causal Networks of Brain Imaging Phenotypes and Bipolar Disorder
Source: PubMed Central journal article supplement — medRxiv. 2024 Dec 13:2024.12.12.24318953. Preprint. [Version 1] doi: 10.1101/2024.12.12.24318953 (PMC11661354; doi:10.1101/2024.12.12.24318953), 2024-12-13
Supplement: media-2.pdf [file media-2.pdf]

| Exposure                                                      | Outcome                        | Beta/OR | 95% C.I. [lower, upper] | P         | N snps | rg      | P(rg)     | h2 (exposure) | DCE beta (dense) | DCE beta (sparse) | UKBiD | Any P > 0.05 (LOO) | N significant methods | Phenotype category           |
|---------------------------------------------------------------|--------------------------------|---------|-------------------------|-----------|--------|---------|-----------|---------------|------------------|-------------------|-------|--------------------|-----------------------|------------------------------|
| IDP dMRI TBSS ICVF Posterior corona radiata L                 | BD                             | 0.8856  | [0.8216, 0.9546]        | 1.497E-03 | 13     | -0.0916 | 1.429E-02 | 0.3286        | -0.0059          | 0                 | 1929  | FALSE              | 5                     | WM tract ICVF                |
| IDP T1 FAST ROIs R caudate                                    | BD                             | 1.2584  | [1.13, 1.4015]          | 2.843E-05 | 9      | 0.0705  | 7.625E-02 | 0.2764        | 0.0299           | 0                 | 125   | FALSE              | 5                     | regional and tissue volume   |
| IDP dMRI ProbtrackX ICVF slf r                                | BD                             | 0.8999  | [0.8452, 0.9581]        | 9.687E-04 | 20     | -0.0365 | 2.894E-01 | 0.3771        | -0.002           | -0.0047           | 1972  | FALSE              | 4                     | WM tract ICVF                |
| IDP dMRI ProbtrackX ISOVF ilf r                               | BD                             | 0.8968  | [0.8432, 0.9539]        | 5.373E-04 | 20     | -0.0146 | 6.974E-01 | 0.2462        | -0.013           | 0                 | 2115  | FALSE              | 4                     | WM tract ISOVF               |
| IDP dMRI TBSS ICVF Superior longitudinal fasciculus L         | BD                             | 0.8975  | [0.8438, 0.9546]        | 5.916E-04 | 19     | -0.0599 | 8.684E-02 | 0.3536        | -0.0026          | -0.0057           | 1943  | FALSE              | 4                     | WM tract ICVF                |
| IDP dMRI TBSS ICVF Retrolenticular part of internal capsule R | BD                             | 0.8999  | [0.8418, 0.9619]        | 1.913E-03 | 14     | -0.0499 | 1.802E-01 | 0.3163        | -0.0006          | 0                 | 1922  | FALSE              | 4                     | WM tract ICVF                |
| IDP dMRI TBSS ICVF Anterior corona radiata L                  | BD                             | 0.8951  | [0.8327, 0.9622]        | 2.641E-03 | 14     | -0.0718 | 3.183E-02 | 0.3566        | -0.0016          | 0                 | 1925  | TRUE               | 4                     | WM tract ICVF                |
| IDP dMRI TBSS ICVF Posterior corona radiata R                 | BD                             | 0.856   | [0.7902, 0.9272]        | 1.385E-04 | 12     | -0.0813 | 2.899E-02 | 0.3287        | -0.0158          | 0                 | 1928  | FALSE              | 4                     | WM tract ICVF                |
| IDP dMRI ProbtrackX ICVF atr l                                | BD                             | 0.8515  | [0.7897, 0.9181]        | 2.868E-05 | 12     | -0.0147 | 6.912E-01 | 0.3477        | -0.0088          | 0                 | 1952  | FALSE              | 4                     | WM tract ICVF                |
| IDP dMRI TBSS ICVF Superior cerebellar peduncle R             | BD                             | 1.1487  | [1.0634, 1.2409]        | 4.326E-04 | 11     | 0.0087  | 8.143E-01 | 0.2979        | 0.0258           | 0                 | 1914  | TRUE               | 4                     | WM tract ICVF                |
| IDP T1 FAST ROIs L caudate                                    | BD                             | 1.2114  | [1.0866, 1.3506]        | 5.482E-04 | 9      | 0.062   | 1.136E-01 | 0.2696        | 0.0242           | 0                 | 124   | FALSE              | 4                     | regional and tissue volume   |
| BD                                                            | wgrh intensity-contrast insula | 0.0936  | [0.0309, 0.1564]        | 3.459E-03 | 56     | -0.0142 | 7.280E-01 | 0.186         | 0.013            | 0                 | 1436  | FALSE              | 3                     | cortical grey-white contrast |
| IDP dMRI TBSS ICVF Body of corpus callosum                    | BD                             | 0.9068  | [0.8592, 0.9572]        | 3.888E-04 | 22     | -0.0356 | 2.812E-01 | 0.3707        | -0.0009          | -0.0123           | 1905  | FALSE              | 3                     | WM tract ICVF                |
| IDP dMRI ProbtrackX ICVF slf l                                | BD                             | 0.8986  | [0.8443, 0.9563]        | 7.591E-04 | 20     | -0.0561 | 1.093E-01 | 0.3737        | 0                | -0.004            | 1971  | FALSE              | 3                     | WM tract ICVF                |
| IDP dMRI ProbtrackX ISOVF ifo r                               | BD                             | 0.8762  | [0.8158, 0.941]         | 2.856E-04 | 16     | 0.0181  | 6.599E-01 | 0.2269        | -0.0135          | 0                 | 2113  | FALSE              | 3                     | WM tract ISOVF               |
| IDP dMRI TBSS ICVF Anterior corona radiata R                  | BD                             | 0.8846  | [0.8245, 0.9491]        | 6.375E-04 | 15     | -0.0759 | 2.704E-02 | 0.3652        | -0.005           | 0                 | 1924  | FALSE              | 3                     | WM tract ICVF                |
| IDP dMRI TBSS ICVF Anterior limb of internal capsule L        | BD                             | 0.8836  | [0.8193, 0.9528]        | 1.306E-03 | 14     | 0.015   | 6.845E-01 | 0.344         | -0.0124          | 0                 | 1919  | FALSE              | 3                     | WM tract ICVF                |
| IDP dMRI TBSS ICVF Cerebral peduncle L                        | BD                             | 0.8731  | [0.8069, 0.9447]        | 7.379E-04 | 13     | 0.1438  | 2.940E-04 | 0.301         | -0.0149          | 0                 | 1917  | FALSE              | 3                     | WM tract ICVF                |
| IDP dMRI ProbtrackX ICVF atr r                                | BD                             | 0.8614  | [0.7982, 0.9295]        | 1.222E-04 | 12     | -0.0367 | 3.309E-01 | 0.3456        | -0.013           | 0                 | 1953  | FALSE              | 3                     | WM tract ICVF                |
| IDP dMRI ProbtrackX ICVF mcp                                  | BD                             | 0.8581  | [0.7936, 0.9278]        | 1.231E-04 | 11     | 0.0258  | 5.208E-01 | 0.2714        | -0.0175          | 0                 | 1966  | FALSE              | 3                     | WM tract ICVF                |
| IDP dMRI TBSS ICVF Anterior limb of internal capsule R        | BD                             | 0.8581  | [0.7989, 0.9444]        | 9.607E-04 | 11     | -0.012  | 7.386E-01 | 0.3524        | -0.0123          | 0                 | 1918  | FALSE              | 3                     | WM tract ICVF                |
| IDP dMRI TBSS MD Superior longitudinal fasciculus L           | BD                             | 1.213   | [1.097, 1.3412]         | 1.660E-04 | 9      | 0.0701  | 4.170E-02 | 0.3304        | 0.0206           | 0                 | 1643  | FALSE              | 3                     | WM tract diffusivity         |
| IDP dMRI ProbtrackX ICVF cst r                                | BD                             | 0.8578  | [0.787, 0.935]          | 4.820E-04 | 9      | 0.012   | 7.409E-01 | 0.323         | -0.0114          | 0                 | 1959  | FALSE              | 3                     | WM tract ICVF                |
| IDP dMRI TBSS ICVF Cingulum hippocampus R                     | BD                             | 0.901   | [0.8472, 0.9582]        | 9.025E-04 | 17     | -0.0028 | 9.435E-01 | 0.3054        | 0                | 0                 | 1938  | FALSE              | 2                     | WM tract ICVF                |
| IDP dMRI TBSS ICVF Posterior thalamic radiation L             | BD                             | 0.9001  | [0.8445, 0.9595]        | 1.246E-03 | 17     | -0.0973 | 1.087E-02 | 0.3058        | -0.002           | 0                 | 1931  | FALSE              | 2                     | WM tract ICVF                |
| IDP dMRI ProbtrackX L3 ifo r                                  | BD                             | 1.1322  | [1.0462, 1.2253]        | 2.064E-03 | 11     | 0.0693  | 5.886E-02 | 0.2951        | 0.0097           | 0                 | 1888  | FALSE              | 2                     | WM tract diffusivity         |
| IDP dMRI TBSS ICVF External capsule R                         | BD                             | 0.8906  | [0.8291, 0.9567]        | 1.517E-03 | 11     | -0.0444 | 2.869E-01 | 0.3118        | -0.0066          | 0                 | 1934  | FALSE              | 2                     | WM tract ICVF                |
| IDP dMRI TBSS MD Anterior limb of internal capsule L          | BD                             | 0.8383  | [0.7498, 0.9374]        | 1.973E-03 | 8      | 0.0267  | 5.423E-01 | 0.2023        | -0.0294          | 0                 | 1619  | FALSE              | 2                     | WM tract diffusivity         |
